# Supplementary material
Source: PubMed Central journal article supplement (PMC4743755)
Supplement: NIHMS601509-supplement-01.pdf [file NIHMS601509-supplement-01.pdf]

## Online Repository Materials

Table E1. Demographic data and test results of patients with hazelnut OFCs

|                                                 | All Patients<br>(n = 116) | Negative OFC<br>(n = 107) | Positive OFC<br>(n = 9) | P Value |
|-------------------------------------------------|---------------------------|---------------------------|-------------------------|---------|
| Median Age, years, (IQR)                        | 9.0                       | 9.0 (6.0-11.0)            | 9.0 (3.5-13.0)          | 0.82    |
| Sex, male, no. (%)                              | 75 (65%)                  | 69 (64%)                  | 6 (67%)                 |         |
| SPT wheal size in mm (range)                    | 3.0 (0.0-17.0)            | 3.0 (0.0-12.0)            | 5.0 (0.0-17.0)          | 0.10    |
| Median Hazelnut sIgE kU <sub>A</sub> /L (range) | 5.02 (0->100)             | 5.96 (0->100)             | 3.74 (.69-56.6)         | 0.84    |

Table E2. Sensitivity and Specificity of IgE levels to Cor a 9 and Cor a 14

|                                        | Sensitivity | Specificity |
|----------------------------------------|-------------|-------------|
| IgE to Cor a 9 (kU <sub>A</sub> /L) ≥  |             |             |
| 0.1                                    | 92.3        | 44.8        |
| 0.35                                   | 84.6        | 65.5        |
| 1                                      | 84.6        | 79.3        |
| 2                                      | 84.6        | 93.1        |
| 5                                      | 53.8        | 100         |
| IgE to Cor a 14 (kU <sub>A</sub> /L) ≥ |             |             |
| 0.1                                    | 84.6        | 65.5        |
| 0.35                                   | 69.2        | 82.8        |
| 1                                      | 69.2        | 100         |
| 2                                      | 53.8        | 100         |
| 5                                      | 38.5        | 100         |
